# Supplementary material
Source: publisher site journal article supplement (https://www.dovepress.com/article/278806)
Supplement: Supplementary file 1 [file get_supplementary_file.php]

**Supplementary Table 1** Annotation of *CFTR* variants included in the study

| dbSNP | Variant | HGVS (NM_000492.3) | HGVS (NP_000483.3) | Assay ID | DAF among patients with CF patients in Russia, %8 | AF (Total) ExAC | AF European (Non-Finnish) |
| --- | --- | --- | --- | --- | --- | --- | --- |
| rs113993960 | F508del | c.1521_1523delCTT | p.F508del | C_151693869_10 | 52.8 | 6.80E-03 | 1.06E-02 |
| hg19:: chr7:117138367-117159446 | CFTRdele2.3 (21kb) | c.54-5940_273+10250del21080 | p.S18Rfs*16 | C990000002A_10 | 6.2 | 4.61E-05b | 1.31E-04b |
| hg19:: chr7:117138367-117159446 | CFTRdele2.3 (21kb) | c.54-5940_273+10250del21080 | p.S18Rfs*16 | C990000002B_20 | 6.2 | 4.61E-05b | 1.31E-04b |
| rs121908751 | E92K | c.274G>A | p.E92K | C_32545261C_10 | 3 | 8.55E-06 | 1.55E-05 |
| rs121908812 | 2143delT | c.2012delT | p.L671* | C_151693914_30 | 2.1 | 8.33E-06 | 1.52E-05 |
| rs75039782 | 3849+10kbC>T | c.3718-2477C>T |  | C_100965026_20 | 2 | 6.37E-05b | 0b |
| rs77010898 | W1282X | c.3846G>A | p.W1282* | C__32545014_20 | 1.9 | 4.00E-04 | 7.00E-04 |
| rs121908786 | 2184insA | c.2052dup | p.Q685fs | C_172767550_10 | 1.8 | 1.67E-05 | 1.52E-05 |
| rs80034486 | N1303K | c.3909C>G | p.N1303K | C__32544994_20 | 1.5 | 1.00E-04 | 2.00E-04 |
| rs113993959 | G542X | c.1624G>T | p.G542* | C__11399026_30 | 1.3 | 3.00E-04 | 4.00E-04 |
| rs397508686 | L138ins | c.413_415dupTAC | p.L138dup | ANKA7N7 | 1.2 | 3.99E-06a | 0a |
| rs121908769 | 394delTT | c.262_263delTT | p.L88Ifs*22 | C_151693788_20 | 0.9 | 3.00E-04 | 4.00E-04 |
| rs121909011 | R334W | c.1000C>T | p.R334W | C____656883_30 | 0.8 | 6.59E-05 | 4.50E-05 |
| rs121908763 | S1196X | c.3587C>G | p.S1196* | C__32295560_20 | 0.5 | 1.65E-05 | 3.01E-05 |
| rs80224560 | 2789+5G>A | c.2657+5G>A |  | C_100964951_10 | 0.5 | 8.24E-05 | 1.00E-04 |
| rs121908783 | 3821delT | c.3691delT | p.S1231Pfs*4 | C_151693965_20 | 0.5 | 2.49E-05 | 0 |
| rs121908805 | S466X | c.1397C>G | p.S466* | C_64676233D_20 | 0.5 | 8.26E-06 | 1.50E-05 |
| rs78194216 | R1066C | c.3196C>T | p.R1066C | C__26083724_20 | 0.3 | 8.37E-06 | 1.52E-05 |
| rs397508612 | 3944delGT | c.3816_3817delGT | p.S1273Lfs*28 | C_400040984_10 | 0.3 | NA | NA |
| rs74597325 | R553X | c.1657C>T | p.R553* | C__27861430_20 | 0.2 | 1.00E-04 | 2.00E-04 |
| rs74767530 | R1162X | c.3484C>T | p.R1162* | C__64676246_10 | 0.2 | 4.98E-05 | 6.04E-05 |
| rs78756941 | 621+1G>T | c.489+1G>T |  | C_100964806_20 | 0.2 | 6.19E-05 | 9.73E-05 |
| rs121908793 | 712-1G>T | c.580-1G>T |  | C_151693825_10 | 0.2 | 8.24E-06 | 1.50E-05 |
| rs387906378 | 3667ins4 | c.3532_3535dupTCAA | p.T1179Ifs*17 | ANFVPYF | 0.1 | 8.28E-06 | 1.50E-05 |
| rs113993958 | D110H | c.328G>C | p.D110H | C____656922_20 | 0.1 | 2.49E-05 | 4.52E-05 |
| rs77932196 | R347P | c.1040G>C | p.R347P | C___656878C_30 | 0.1 | 8.24E-06 | 1.50E-05 |
| rs77834169 | R117C | c.349C>T | p.R117C | C__27540773_10 | 0.1 | 3.00E-04 | 6.00E-04 |
| rs79850223 | R1158X | c.3472C>T | p.R1158* | C__32545051_10 | 0.1 | 4.16E-05 | 4.54E-05 |
| rs75541969 | D1152H | c.3454G>C | p.D1152H | C__32545067_20 | 0.1 | 3.00E-04 | 4.00E-04 |
| rs75961395 | G85E | c.254G>A | p.G85E | C__32545286_20 | 0.1 | 6.60E-05 | 1.00E-04 |
| rs121908749 | R75X | c.223C>T | p.R75* | C__64676210_20 | 0.1 | 2.47E-05 | 1.50E-05 |
| rs76713772 | 1717-1G>A | c.1585-1G>A |  | C_100964916_20 | 0.1 | 9.13E-05 | 2.00E-04 |
| rs121908770 | 574delA | c.442delA | p.I148Lfs*5 | C_151693817_20 | 0.1 | 8.47E-06 | 1.54E-05 |
| rs121908748 | 1898+1G>A | c.1766+1G>A |  | C_151693906_10 | 0.1 | 1.67E-05 | 3.03E-05 |
| rs121908747 | 3659delC | c.3528delC | p.K1177Sfs*15 | C_151693962_30 | 0.1 | 3.00E-04 | 6.00E-04 |
| rs397508158 | 1248+1G>A | c.1116+1G>A |  | C_201385092_10 | 0.1 | 3.991E-06a | 8.84E-06a |
| rs397508276 | Y569H | c.1705T>G | p.Y569D | C_201390110_10 | 0.1 | 9.94E-05 | 0 |
| rs397508464 | Q98R | c.293A>G | p.Q98R | C_201397567_10 | 0.1 | 1.67E-05 | 0 |
| rs397508706 | 4382delA | c.4251delA | p.E1418Rfs*14 | C_201404927_10 | 0.1 | NA | NA |
| rs397508449 | A96E | c.287C>A | p.A96E | C_400029971_10 | 0.1 | NA | NA |
| rs397508573 | S1159F | c.3476C>T | p.S1159F | C_400040945_10 | 0.1 | 3.99E-06a | 8.84E-06a |
| rs78655421 | R117H | c.350G>A | p.R117H | C__26083773_20 | 0.04 | 1.50E-03 | 2.60E-03 |
| rs75527207 | G551D | c.1652G>A | p.G551D | C__32545127_20 | 0.04 | 1.00E-04 | 3.00E-04 |
| rs76151804 | 3272-26A>G | c.3140-26A>G |  | C_100964965_10 | 0.04 | 1.41E-05 | 2.73E-05 |
| rs121908778 | 2043delG | c.1911delG | p.Q637Hfs*26 | C_151693912_20 | 0.04 | NA | NA |
| rs121908746 | 2184delA | c.2052delA | p.K684Nfs*38 | C_172767547_20 | 0.04 | 5.85E-05 | 9.12E-05 |
| rs121908799 | 2183AA>G | c.2051_2052delAAinsG | p.K684Sfs*38 | C172767555C_30 | 0.04 | 4.01E-03a | 8.91E-06a |
| rs121909012 | R851X | c.2551C>T | p.R851* | C____656779_20 | NA | 8.25E-06 | 0 |
| rs77932196 | R347H | c.1040G>A | p.R347H | C___656878D_20 | NA | 1.65E-05 | 1.50E-05 |
| rs121909019 | R1066H | c.3197G>A | p.R1066H | C__26083723_20 | NA | 5.85E-05 | 7.59E-05 |
| rs121908760 | R709X | c.2125C>T | p.R709* | C__32295645_30 | NA | 1.67E-05 | 0 |
| rs121908755 | S549N | c.1646G>A | p.S549N | C__32545131_20 | NA | 1.00E-04 | 3.01E-05 |
| rs121908803 | P205S | c.613C>T | p.P205S | C__32545236_30 | NA | 3.98E-06a | 0a |
| rs121908771 | 663delT | c.531delT | p.I177Mfs*12 | C_151693822_20 | NA | 7.98E-06a | 1.76E-05a |
| rs121908745 | I507del | c.1519_1521delATC | p.I507del | C_151693868_10 | NA | 4.95E-05 | 3.00E-05 |
| rs121908811 | 3791delC | c.3659delC | p.T1220Kfs*8 | C_172767557_20 | NA | 1.00E-04 | 7.52E-05 |
| rs397508200 | 1525-1G>A | c.1393-1G>A |  | C_201387583_10 | NA | 4.95E-05 | 0 |
| rs397508538 | E1104X | c.3310G>T | p.E1104* | C_201400019_10 | NA | NA | NA |
| rs397508152 | Q359K/T360K | c.1075_1079delCAAACinsAAAAA | p.Q359_T360delinsKK | C_203006811_10 | NA | NA | NA |
| rs121908751 | E92X | c.274G>T | p.E92* | C_32545261D_20 | NA | 8.55E-06 | 1.55E-05 |
| rs121908805 | S466X(TAA) | c.1397C>A | p.S466* | C_64676233C_10 | NA | 8.26E-06 | 1.50E-05 |

Notes: aAllele frequency in GNOMAD Exome,14 bAllele frequency in GNOMAD Genome14
